# Supplementary material
Source: PubMed Central journal article supplement (PMC2770621)
Supplement: mmc1.pdf [file mmc1.pdf]

Biophysical Journal, Volume 97

**Supporting Material**

**Protein stabilization and the Hofmeister effect. The role of hydrophobic salvation**

Xavier Tadeo, Blanca López-Méndez, David Castaño, Tamara Trigueros, and Oscar Millet

## SUPPLEMENTARY MATERIAL

*Table S1: Legend for the multiple K to Q replacements.*

| <i>Name</i> | <i>Legend</i>                           |
|-------------|-----------------------------------------|
| <i>Kx2Q</i> | K42Q + K54Q                             |
| <i>Kx3Q</i> | K28Q + K42Q + K54Q                      |
| <i>Kx4Q</i> | K28Q + K42Q + K54Q + K61Q               |
| <i>Kx5Q</i> | K23Q + K28Q + K42Q + K54Q + K61Q        |
| <i>Kx6Q</i> | K23Q + K28Q + K41Q + K42Q + K54Q + K61Q |

**Table S2.** Summary of experimental restraints and statistics of the structure determination of the Kx5Q mutant. Average values over the 20 energy-refined conformers.

|                                                                       |                      |
|-----------------------------------------------------------------------|----------------------|
| <i>NOE upper distance limits:</i>                                     | 1335                 |
| <i>Short-range, <math> i-j  \leq 1</math></i>                         | 631                  |
| <i>Medium-range, <math>1 &lt;  i-j  &lt; 5</math></i>                 | 226                  |
| <i>Long-range, <math> i-j  \geq 5</math></i>                          | 498                  |
| <i><math>\phi/\psi</math> dihedral angle restraints from TALOS</i>    | 76                   |
| <i>Maximal violation (<math>\text{\AA}</math>)</i>                    | 0.14                 |
| <i>Violations <math>&gt; 0.2 \text{\AA}</math></i>                    | 0                    |
| <i>CYANA target function (<math>\text{\AA}^2</math>)</i>              | $0.54 \pm 0.11$      |
| <i>AMBER energy (kcal/mol)</i>                                        | $-3051.70 \pm 55.66$ |
| <i>Ramachandran plot statistics (%)</i>                               |                      |
| <i>residues in:</i>                                                   |                      |
| <i>most favoured regions</i>                                          | 88.4                 |
| <i>additionally allowed regions</i>                                   | 11.1                 |
| <i>generously allowed regions</i>                                     | 0.6                  |
| <i>disallowed regions</i>                                             | 0                    |
| <i>RMSD to mean coordinates (<math>\text{\AA}</math>)</i>             |                      |
| <i>backbone/heavy atoms (from 4 to 64)</i>                            | 0.34 / 0.70          |
| <i>RMSD to wild type ProtL, PDB ID 1HZ6 (<math>\text{\AA}</math>)</i> |                      |
| <i>backbone (from 4 to 64)</i>                                        | 0.77                 |
| <i>backbone (secondary structure)</i>                                 | 0.58                 |

**Table S3:** Experimental data for the single point mutants considered in the present study ( in the absence of cosolute).

| <b>Mutant</b>             | <b>Average <math>T_m</math> / °C</b> | <b>Number of independent measurements<br/>(CD / Fluorescence)</b> |
|---------------------------|--------------------------------------|-------------------------------------------------------------------|
| <i>K7Q</i>                | 64.6 ± 2.1                           | 3 / 3                                                             |
| <i>K23Q</i>               | 66.1 ± 0.5                           | 3 / 3                                                             |
| <i>K28Q</i>               | 71.3 ± 0.9                           | 3 / 3                                                             |
| <i>K41Q</i>               | 69.4 ± 0.9                           | 3 / 3                                                             |
| <i>K42Q</i>               | 63.8 ± 1.4                           | 3 / 3                                                             |
| <i>K54Q</i>               | 67.1 ± 0.5                           | 3 / 3                                                             |
| <i>K61Q</i>               | 65.5 ± 1.4                           | 3 / 3                                                             |
| <i>E2D</i>                | 70.0 ± 0.8                           | 4 / 4                                                             |
| <i>E3D</i>                | 68.0 ± 0.4                           | 2 / 1                                                             |
| <i>E21D</i>               | 63.9 ± 1.4                           | 2 / 3                                                             |
| <i>E32D</i>               | 70.9 ± 0.6                           | 4 / 4                                                             |
| <i>E46D</i>               | 70.3 ± 0.7                           | 4 / 4                                                             |
| <i>K23A</i>               | 63.1 ± 0.6                           | 3 / 2                                                             |
| <i>Kx2Q<sup>(a)</sup></i> | 66.1 ± 0.5                           | 3 / 3                                                             |
| <i>Kx3Q<sup>(a)</sup></i> | 69.4 ± 0.8                           | 3 / 3                                                             |
| <i>Kx4Q<sup>(a)</sup></i> | 62.3 ± 0.6                           | 3 / 3                                                             |
| <i>Kx5Q<sup>(a)</sup></i> | 61.9 ± 0.9                           | 3 / 3                                                             |
| <i>Kx6Q<sup>(a)</sup></i> | 60.2 ± 0.4                           | 3 / 3                                                             |

(a) Legend: Kx2Q = K42Q, K54Q; Kx3Q = K28Q, K42Q, K54Q; Kx4Q = K28Q, K42Q, K54Q, K61Q; Kx5Q = K23Q, K28Q, K42Q, K54Q, K61Q; Kx6Q = K23Q, K28Q, K41Q, K42Q, K54Q, K61Q.

**Table S4: Solvent accessibilities and residues non-polar areas employed in equation 2.**

| Mutant               | $\chi_{np,Mut}^F$ <sup>(a)</sup> | $\chi_{np,WT}^F$ <sup>(a)</sup> |                      |                      |                           |                           |                           |                           |                           |
|----------------------|----------------------------------|---------------------------------|----------------------|----------------------|---------------------------|---------------------------|---------------------------|---------------------------|---------------------------|
| K7Q                  | 0.867 ± 0.06                     | <b>0.738 ± 0.17</b>             |                      |                      |                           |                           |                           |                           |                           |
| K23Q                 | <b>0.751 ± 0.03</b>              | <b>0.660 ± 0.18</b>             |                      |                      |                           |                           |                           |                           |                           |
| K28Q                 | <b>0.665 ± 0.10</b>              | <b>0.363 ± 0.06</b>             |                      |                      |                           |                           |                           |                           |                           |
| K41Q                 | 0.852 ± 0.08                     | <b>0.492 ± 0.20</b>             |                      |                      |                           |                           |                           |                           |                           |
| K42Q                 | <b>0.249 ± 0.07</b>              | <b>0.375 ± 0.09</b>             |                      |                      |                           |                           |                           |                           |                           |
| K54Q                 | <b>0.313 ± 0.05</b>              | <b>0.328 ± 0.07</b>             |                      |                      |                           |                           |                           |                           |                           |
| K61Q                 | <b>0.709 ± 0.14</b>              | <b>0.623 ± 0.14</b>             |                      |                      |                           |                           |                           |                           |                           |
| E2D                  | 0.448 ± 0.06                     | <b>0.307 ± 0.15</b>             |                      |                      |                           |                           |                           |                           |                           |
| E3D                  | 0.384 ± 0.04                     | <b>0.416 ± 0.23</b>             |                      |                      |                           |                           |                           |                           |                           |
| E21D                 | 0.682 ± 0.07                     | <b>0.698 ± 0.22</b>             |                      |                      |                           |                           |                           |                           |                           |
| E32D                 | 0.757 ± 0.10                     | <b>0.522 ± 0.27</b>             |                      |                      |                           |                           |                           |                           |                           |
| E46D                 | 0.539 ± 0.04                     | <b>0.504 ± 0.19</b>             |                      |                      |                           |                           |                           |                           |                           |
| K23A                 | 0.696 ± 0.05                     | <b>0.660 ± 0.18</b>             |                      |                      |                           |                           |                           |                           |                           |
| $\chi_{np,K}^U$      | $\chi_{np,Q}^U$                  | $\chi_{np,E}^U$                 | $\chi_{np,D}^U$      | $\chi_{np,A}^U$      | $A_{np}^K / \text{\AA}^2$ | $A_{np}^Q / \text{\AA}^2$ | $A_{np}^E / \text{\AA}^2$ | $A_{np}^D / \text{\AA}^2$ | $A_{np}^A / \text{\AA}^2$ |
| 0.248 <sup>(b)</sup> | 0.295 <sup>(b)</sup>             | 0.277 <sup>(b)</sup>            | 0.222 <sup>(b)</sup> | 0.360 <sup>(b)</sup> | 122 <sup>(c)</sup>        | 66 <sup>(c)</sup>         | 69 <sup>(c)</sup>         | 45 <sup>(c)</sup>         | 86 <sup>(c)</sup>         |

(a) Bold values are calculated from high resolution NMR structures (2PTL{Wikstrom, 1994 #142} or 2JZP). The 12 conformations of minimal energy have been used to estimate the error. Plain values have been obtained from homology models (using the servers' phyre {Bennett-Lovsey, 2007 #139} and swiss model workspace {Arnold, 2006 #125}). The error bars reflect the discrepancies between the models.

(b) Calculated from the expression:  $\chi_{np}^U = A_{np}^U / A_{np}$ . Values for  $A_{np}$  are taken from ref. {Bernado, 2006 #140}.

(c) Obtained from {Karplus, 1997 #134}.

**Table S5:** Experimental  $T_m$  values for sodium sulfate.

| <b>Sodium sulfate</b> |                   |                           |                           |                           |                           |
|-----------------------|-------------------|---------------------------|---------------------------|---------------------------|---------------------------|
| <i>Mutant</i>         | <i>Conc. / mM</i> | <i>T<sub>m</sub> / °C</i> | <i>Mutant</i>             | <i>Conc. / mM</i>         | <i>T<sub>m</sub> / °C</i> |
| <i>K7Q</i>            | 250               | 72.6 ± 0.6                | <i>K61Q</i>               | 500                       | 78.5 ± 0.6                |
|                       | 500               | 78.2 ± 0.5                |                           | 750                       | 84.0 ± 0.7                |
|                       | 750               | 83.7 ± 0.4                |                           | 1000                      | 87.7 ± 0.4                |
|                       | 1000              | 88.2 ± 0.9                |                           | <i>Kx2Q<sup>(a)</sup></i> | 100                       |
| <i>K23Q</i>           | 250               | 71.6 ± 1.4                | 250                       |                           | 71.9 ± 1.0                |
|                       | 500               | 77.0 ± 1.1                | 330                       |                           | 72.3 ± 0.3                |
|                       | 750               | 82.3 ± 0.1                | 450                       |                           | 76.3 ± 0.3                |
| <i>K28Q</i>           | 200               | 74.0 ± 0.8                | <i>Kx3Q<sup>(a)</sup></i> | 600                       | 79.7 ± 0.4                |
|                       | 400               | 77.1 ± 0.7                |                           | 50                        | 70.3 ± 0.1                |
|                       | 800               | 82.5 ± 0.3                |                           | 100                       | 71.5 ± 0.1                |
| <i>K41Q</i>           | 200               | 71.8 ± 1.3                |                           | 200                       | 74.2 ± 0.6                |
|                       | 400               | 77.6 ± 1.0                |                           | 400                       | 78.1 ± 1.4                |
|                       | 600               | 81.1 ± 1.0                |                           | 750                       | 82.9 ± 1.8                |
| <i>K42Q</i>           | 200               | 65.9 ± 1.5                | <i>Kx4Q<sup>(a)</sup></i> | 250                       | 70.1 ± 0.2                |
|                       | 250               | 67.4 ± 0.4                |                           | 400                       | 73.1 ± 0.2                |
|                       | 400               | 70.1 ± 1.4                |                           | 750                       | 79.7 ± 1.3                |
|                       | 500               | 73.2 ± 1.1                |                           | 850                       | 82.0 ± 0.3                |
|                       | 600               | 75.4 ± 1.3                |                           | <i>Kx5Q<sup>(a)</sup></i> | 250                       |
| 750                   | 76.5 ± 0.5        | 500                       | 76.7 ± 0.2                |                           |                           |
| <i>K54Q</i>           | 200               | 73.2 ± 0.7                | 750                       |                           | 82.2 ± 1.6                |
|                       | 400               | 76.3 ± 0.6                | <i>Kx6Q<sup>(a)</sup></i> | 250                       | 67.2 ± 0.2                |
|                       | 600               | 79.4 ± 0.9                |                           | 450                       | 72.8 ± 0.3                |
| 800                   | 84.5 ± 0.7        | 660                       |                           | 79.9 ± 0.3                |                           |
| <i>K61Q</i>           | 250               | 72.0 ± 0.5                |                           |                           |                           |

(a) Legend: Kx2Q = K42Q, K54Q; Kx3Q = K28Q, K42Q, K54Q; Kx4Q = K28Q, K42Q, K54Q, K61Q; Kx5Q = K23Q, K28Q, K42Q, K54Q, K61Q; Kx6Q = K23Q, K28Q, K41Q, K42Q, K54Q, K61Q.

**Table S6:** Experimental  $T_m$  values for sodium phosphate.

| <b>Sodium phosphate</b> |                   |                           |                           |                           |                           |
|-------------------------|-------------------|---------------------------|---------------------------|---------------------------|---------------------------|
| <i>Mutant</i>           | <i>Conc. / mM</i> | <i>T<sub>m</sub> / °C</i> | <i>Mutant</i>             | <i>Conc. / mM</i>         | <i>T<sub>m</sub> / °C</i> |
| <i>K7Q</i>              | 200               | 67.4 ± 0.3                | <i>K61Q</i>               | 400                       | 71.2 ± 0.9                |
|                         | 400               | 70.9 ± 0.5                |                           | 600                       | 75.2 ± 0.8                |
|                         | 600               | 74.3 ± 0.3                |                           | 800                       | 77.0 ± 1.0                |
|                         | 800               | 78.4 ± 0.6                |                           | <i>Kx2Q<sup>(a)</sup></i> | 200                       |
| <i>K23Q</i>             | 200               | 69.1 ± 0.3                | 400                       |                           | 71.2 ± 1.6                |
|                         | 400               | 71.7 ± 0.2                | 600                       |                           | 75.9 ± 0.4                |
|                         | 600               | 75.7 ± 0.3                | 800                       |                           | 77.0 ± 1.0                |
|                         | 800               | 77.2 ± 0.4                | <i>Kx3Q<sup>(a)</sup></i> | 200                       | 73.3 ± 0.8                |
| <i>K28Q</i>             | 200               | 72.9 ± 0.8                |                           | 400                       | 75.7 ± 0.9                |
|                         | 400               | 75.0 ± 0.6                |                           | 600                       | 79.3 ± 0.9                |
|                         | 800               | 78.6 ± 0.4                |                           | 800                       | 81.7 ± 0.7                |
| <i>K41Q</i>             | 200               | 70.6 ± 0.8                | <i>Kx4Q<sup>(a)</sup></i> | 200                       | 66.7 ± 0.2                |
|                         | 400               | 75.8 ± 0.5                |                           | 400                       | 68.8 ± 0.1                |
|                         | 600               | 76.6 ± 1.5                |                           | 600                       | 72.0 ± 0.1                |
|                         | 800               | 75.4 ± 3.9                |                           | 800                       | 74.9 ± 0.5                |
| <i>K42Q</i>             | 200               | 64.7 ± 0.9                | <i>Kx5Q<sup>(a)</sup></i> | 900                       | 77.2 ± 0.4                |
|                         | 400               | 69.7 ± 1.6                |                           | 200                       | 66.9 ± 0.3                |
|                         | 600               | 72.2 ± 1.1                |                           | 400                       | 70.7 ± 0.5                |
|                         | 800               | 75.2 ± 0.7                |                           | 600                       | 76.1 ± 0.8                |
| <i>K54Q</i>             | 200               | 70.8 ± 0.7                | <i>Kx6Q<sup>(a)</sup></i> | 800                       | 77.9 ± 0.1                |
|                         | 400               | 72.7 ± 0.6                |                           | 200                       | 64.5 ± 0.4                |
|                         | 600               | 75.5 ± 0.7                |                           | 400                       | 68.9 ± 1.3                |
|                         | 800               | 77.4 ± 0.9                |                           | 600                       | 74.5 ± 0.5                |
| <i>K61Q</i>             | 200               | 69.1 ± 0.7                | 800                       | 80.5 ± 0.5                |                           |

(a) Legend: Kx2Q = K42Q, K54Q; Kx3Q = K28Q, K42Q, K54Q; Kx4Q = K28Q, K42Q, K54Q, K61Q; Kx5Q = K23Q, K28Q, K42Q, K54Q, K61Q; Kx6Q = K23Q, K28Q, K41Q, K42Q, K54Q, K61Q.

**Table S7: Experimental  $T_m$  values for sodium fluoride.**

| <b>Sodium fluoride</b> |                   |                           |                           |                   |                           |
|------------------------|-------------------|---------------------------|---------------------------|-------------------|---------------------------|
| <i>Mutant</i>          | <i>Conc. / mM</i> | <i>T<sub>m</sub> / °C</i> | <i>Mutant</i>             | <i>Conc. / mM</i> | <i>T<sub>m</sub> / °C</i> |
| <i>K7Q</i>             | 200               | 68.0 ± 0.8                | <i>K61Q</i>               | 200               | 68.5 ± 1.1                |
|                        | 400               | 71.1 ± 0.6                |                           | 400               | 70.5 ± 1.0                |
|                        | 600               | 73.4 ± 1.5                |                           | 600               | 74.3 ± 0.8                |
|                        | 800               | 75.6 ± 1.4                |                           | 800               | 76.0 ± 0.8                |
| <i>K23Q</i>            | 200               | 68.7 ± 1.1                | <i>Kx2Q<sup>(a)</sup></i> | 200               | 69.3 ± 0.9                |
|                        | 400               | 72.1 ± 0.3                |                           | 300               | 70.1 ± 0.4                |
|                        | 600               | 74.1 ± 0.3                |                           | 400               | 71.3 ± 0.1                |
|                        | 800               | 76.1 ± 0.2                |                           | 600               | 74.8 ± 0.4                |
| <i>K28Q</i>            | 200               | 73.8 ± 1.7                | <i>Kx3Q<sup>(a)</sup></i> | 200               | 72.1 ± 0.1                |
|                        | 400               | 76.1 ± 1.3                |                           | 400               | 73.8 ± 0.6                |
|                        | 600               | 78.5 ± 1.6                |                           | 600               | 77.1 ± 1.7                |
| <i>K41Q</i>            | 200               | 72.2 ± 0.4                | <i>Kx4Q<sup>(a)</sup></i> | 760               | 79.5 ± 3.3                |
|                        | 400               | 74.7 ± 1.3                |                           | 200               | 66.0 ± 0.7                |
|                        | 600               | 79.2 ± 1.2                |                           | 400               | 69.1 ± 0.5                |
|                        | 760               | 79.7 ± 0.9                |                           | 600               | 71.6 ± 1.2                |
| <i>K42Q</i>            | 200               | 64.2 ± 2.7                | <i>Kx5Q<sup>(a)</sup></i> | 760               | 74.9 ± 0.2                |
|                        | 400               | 67.6 ± 0.5                |                           | 200               | 66.9 ± 0.6                |
|                        | 600               | 69.2 ± 1.3                |                           | 400               | 71.0 ± 0.4                |
|                        | 760               | 70.5 ± 0.6                |                           | 640               | 74.3 ± 0.6                |
| <i>K54Q</i>            | 200               | 71.1 ± 1.0                | <i>Kx6Q<sup>(a)</sup></i> | 100               | 62.6 ± 2.1                |
|                        | 400               | 72.1 ± 1.0                |                           | 250               | 65.0 ± 0.2                |
|                        | 600               | 75.3 ± 0.7                |                           | 300               | 65.6 ± 0.7                |
|                        | 800               | 77.8 ± 1.3                |                           | 500               | 70.4 ± 0.5                |

(a) Legend: Kx2Q = K42Q, K54Q; Kx3Q = K28Q, K42Q, K54Q; Kx4Q = K28Q, K42Q, K54Q, K61Q; Kx5Q = K23Q, K28Q, K42Q, K54Q, K61Q; Kx6Q = K23Q, K28Q, K41Q, K42Q, K54Q, K61Q.



**Table S8: Experimental  $T_m$  values for sodium nitrate.**

| <b>Sodium nitrate</b> |                   |                           |                           |                   |                           |
|-----------------------|-------------------|---------------------------|---------------------------|-------------------|---------------------------|
| <i>Mutant</i>         | <i>Conc. / mM</i> | <i>T<sub>m</sub> / °C</i> | <i>Mutant</i>             | <i>Conc. / mM</i> | <i>T<sub>m</sub> / °C</i> |
| <i>K7Q</i>            | 200               | 63.6 ± 0.1                | <i>K54Q</i>               | 750               | 63.5 ± 1.3                |
|                       | 400               | 62.3 ± 0.4                |                           | 1000              | 62.4 ± 1.3                |
|                       | 600               | 61.8 ± 0.3                | <i>K61Q</i>               | 250               | 65.2 ± 1.1                |
|                       | 800               | 60.0 ± 0.3                |                           | 500               | 63.5 ± 1.0                |
| <i>K23Q</i>           | 200               | 64.2 ± 0.5                | <i>Kx2Q<sup>(a)</sup></i> | 1000              | 60.3 ± 0.8                |
|                       | 400               | 63.5 ± 0.7                |                           | 500               | 63.3 ± 0.2                |
|                       | 600               | 62.3 ± 0.5                | 750                       | 61.8 ± 0.5        |                           |
|                       | 800               | 60.6 ± 0.3                | 1000                      | 61.4 ± 0.3        |                           |
| <i>K28Q</i>           | 200               | 69.5 ± 0.8                | <i>Kx3Q<sup>(a)</sup></i> | 250               | 67.8 ± 0.01               |
|                       | 400               | 68.7 ± 1.2                |                           | 500               | 65.6 ± 0.4                |
|                       | 600               | 66.8 ± 0.3                | 750                       | 63.2 ± 0.3        |                           |
|                       | 800               | 65.6 ± 0.3                | <i>Kx4Q<sup>(a)</sup></i> | 100               | 61.5 ± 0.1                |
| <i>K41Q</i>           | 250               | 67.3 ± 2.7                |                           | 250               | 61.1 ± 0.4                |
|                       | 500               | 65.5 ± 0.5                |                           | 350               | 60.9 ± 0.01               |
|                       | 1000              | 63.1 ± 0.6                | 500                       | 59.4 ± 0.9        |                           |
| <i>K42Q</i>           | 500               | 61.6 ± 1.3                | <i>Kx5Q<sup>(a)</sup></i> | 250               | 60.2 ± 0.4                |
|                       | 1000              | 59.1 ± 0.9                |                           | 500               | 58.1 ± 0.5                |
| <i>K54Q</i>           | 250               | 66.2 ± 1.0                |                           | 750               | 57.3 ± 0.2                |
|                       | 500               | 65.8 ± 0.7                | 1000                      | 55.3 ± 0.7        |                           |

(a) Legend: Kx2Q = K42Q, K54Q; Kx3Q = K28Q, K42Q, K54Q; Kx4Q = K28Q, K42Q, K54Q, K61Q; Kx5Q = K23Q, K28Q, K42Q, K54Q, K61Q.

**Table S9: Experimental  $T_m$  values for sodium perchlorate.**

| <b>Sodium perchlorate</b> |                   |                           |                           |                   |                           |
|---------------------------|-------------------|---------------------------|---------------------------|-------------------|---------------------------|
| <i>Mutant</i>             | <i>Conc. / mM</i> | <i>T<sub>m</sub> / °C</i> | <i>Mutant</i>             | <i>Conc. / mM</i> | <i>T<sub>m</sub> / °C</i> |
| <i>K7Q</i>                | 200               | 63.8 ± 0.8                | <i>K61Q</i>               | 800               | 56.8 ± 1.0                |
|                           | 400               | 61.8 ± 1.0                |                           | 200               | 63.4 ± 0.8                |
|                           | 600               | 58.8 ± 0.3                |                           | 400               | 61.6 ± 0.8                |
|                           | 800               | 58.0 ± 0.9                |                           | 600               | 58.7 ± 0.3                |
| <i>K23Q</i>               | 200               | 63.4 ± 0.5                | <i>Kx2Q<sup>(a)</sup></i> | 800               | 57.7 ± 0.5                |
|                           | 400               | 61.7 ± 0.4                |                           | 250               | 61.9 ± 0.04               |
|                           | 600               | 60.2 ± 0.5                |                           | 500               | 57.8 ± 0.2                |
|                           | 800               | 58.2 ± 0.4                |                           | 1000              | 52.8 ± 1.5                |
| <i>K28Q</i>               | 200               | 69.2 ± 0.3                | <i>Kx3Q<sup>(a)</sup></i> | 100               | 67.7 ± 0.2                |
|                           | 400               | 66.7 ± 0.5                |                           | 250               | 65.9 ± 0.2                |
|                           | 600               | 64.6 ± 0.4                |                           | 750               | 60.8 ± 0.2                |
|                           | 800               | 61.8 ± 0.8                |                           | 200               | 58.9 ± 0.9                |
| <i>K41Q</i>               | 200               | 65.1 ± 0.6                | <i>Kx4Q<sup>(a)</sup></i> | 600               | 56.5 ± 0.3                |
|                           | 400               | 59.6 ± 1.6                |                           | 700               | 53.0 ± 0.9                |
|                           | 800               | 58.6 ± 1.5                |                           | 250               | 59.0 ± 0.3                |
| <i>K42Q</i>               | 200               | 59.9 ± 0.7                | <i>Kx5Q<sup>(a)</sup></i> | 500               | 57.4 ± 0.7                |
|                           | 400               | 55.2 ± 0.6                |                           | 750               | 54.5 ± 0.4                |
|                           | 600               | 55.1 ± 1.0                |                           | 1000              | 53.3 ± 0.9                |
|                           | 800               | 53.9 ± 0.8                |                           | 500               | 56.0 ± 0.7                |
| <i>K54Q</i>               | 200               | 62.6 ± 0.8                | <i>Kx6Q<sup>(a)</sup></i> | 750               | 52.0 ± 0.5                |
|                           | 400               | 61.0 ± 0.2                |                           | 1000              | 49.5 ± 0.6                |
|                           | 600               | 57.6 ± 0.7                |                           |                   |                           |

(a) Legend: Kx2Q = K42Q, K54Q; Kx3Q = K28Q, K42Q, K54Q; Kx4Q = K28Q, K42Q, K54Q, K61Q; Kx5Q = K23Q, K28Q, K42Q, K54Q, K61Q; Kx6Q = K23Q, K28Q, K41Q, K42Q, K54Q, K61Q.

**Table S10: Experimental  $T_m$  values for sodium thiocyanate.**

| <b>Sodium thiocyanate</b> |                   |                              |                           |                           |                              |            |
|---------------------------|-------------------|------------------------------|---------------------------|---------------------------|------------------------------|------------|
| <b>Mutant</b>             | <b>Conc. / mM</b> | <b><math>T_m</math> / °C</b> | <b>Mutant</b>             | <b>Conc. / mM</b>         | <b><math>T_m</math> / °C</b> |            |
| <i>K7Q</i>                | 200               | 63.0 ± 0.3                   | <i>K61Q</i>               | 600                       | 53.1 ± 0.5                   |            |
|                           | 400               | 57.7 ± 1.3                   |                           | 800                       | 49.5 ± 0.8                   |            |
|                           | 600               | 53.8 ± 0.8                   | <i>Kx2Q<sup>(a)</sup></i> | 250                       | 58.9 ± 0.3                   |            |
|                           | 800               | 49.9 ± 0.5                   |                           | 500                       | 54.4 ± 0.8                   |            |
| <i>K23Q</i>               | 200               | 61.3 ± 0.7                   | 750                       | 50.7 ± 0.3                |                              |            |
|                           | 400               | 57.9 ± 0.3                   | 1000                      | 47.1 ± 0.4                |                              |            |
|                           | 600               | 52.2 ± 0.8                   | <i>Kx3Q<sup>(a)</sup></i> | 100                       | 67.6 ± 0.2                   |            |
| <i>K28Q</i>               | 200               | 65.9 ± 0.5                   |                           | 250                       | 64.9 ± 0.9                   |            |
|                           | 400               | 60.6 ± 1.3                   |                           | 300                       | 64.7 ± 0.5                   |            |
|                           | 800               | 54.2 ± 0.6                   |                           | 375                       | 63.4 ± 0.3                   |            |
| <i>K41Q</i>               | 200               | 64.4 ± 1.2                   | <i>Kx4Q<sup>(a)</sup></i> | 500                       | 60.7 ± 0.5                   |            |
|                           | 400               | 62.1 ± 0.8                   |                           | 100                       | 60.1 ± 0.5                   |            |
|                           | 600               | 58.7 ± 1.3                   |                           | 300                       | 56.3 ± 0.3                   |            |
|                           | 800               | 56.2 ± 0.6                   |                           | 400                       | 54.0 ± 0.9                   |            |
| <i>K42Q</i>               | 200               | 59.5 ± 0.8                   | <i>Kx5Q<sup>(a)</sup></i> | 100                       | 60.9 ± 0.4                   |            |
|                           | 400               | 56.4 ± 0.6                   |                           | 200                       | 58.0 ± 1.3                   |            |
|                           | 600               | 53.3 ± 0.2                   |                           | 450                       | 55.4 ± 0.8                   |            |
|                           | 800               | 51.0 ± 0.7                   |                           | 600                       | 52.2 ± 1.3                   |            |
| <i>K54Q</i>               | 250               | 59.4 ± 0.8                   |                           | <i>Kx6Q<sup>(a)</sup></i> | 750                          | 48.0 ± 0.6 |
|                           | 500               | 55.0 ± 0.1                   |                           |                           | 200                          | 55.7 ± 0.5 |
|                           | 750               | 50.7 ± 0.5                   | 400                       |                           | 53.0 ± 0.8                   |            |
|                           | 1000              | 46.5 ± 0.7                   | 500                       |                           | 50.9 ± 0.3                   |            |
| <i>K61Q</i>               | 200               | 62.4 ± 0.8                   | 650                       | 47.0 ± 0.8                |                              |            |
|                           | 400               | 57.3 ± 0.5                   | 750                       | 43.8 ± 0.4                |                              |            |

(a) Legend: Kx2Q = K42Q, K54Q; Kx3Q = K28Q, K42Q, K54Q; Kx4Q = K28Q, K42Q, K54Q, K61Q; Kx5Q = K23Q, K28Q, K42Q, K54Q, K61Q; Kx6Q = K23Q, K28Q, K41Q, K42Q, K54Q, K61Q.

**Table S11:** Comparison of the  $T_m$  variation produced by the cosolute ( $\partial T_m / \partial C_3$ ) and the salting in coefficient for K7Q.

| Anion              | $\partial T_m / \partial C_3$<br>$^{\circ}\text{C}\cdot\text{M}^{-1}$ | Salting-in constant(a)<br>$\text{M}^{-1}$ |
|--------------------|-----------------------------------------------------------------------|-------------------------------------------|
| <i>Sulfate</i>     | 2.33                                                                  | 0.013                                     |
| <i>Phosphate</i>   | 1.76                                                                  | n.a.                                      |
| <i>Fluoride</i>    | 1.43                                                                  | 0.027 (KF)                                |
| <i>Nitrate</i>     | -5.5                                                                  | n.a.                                      |
| <i>Perchlorate</i> | -9.1                                                                  | 0.097                                     |
| <i>Thiocyanate</i> | -19.3                                                                 | 0.077                                     |

(a) Data taken from ref. 4.
